# Supplementary material for: The Electric Current Effect on Electrochemical Deconsolidation of Spherical Fuel Elements
Source: Hindawi journal article supplement (doi:10.1155/2017/2126876), 2017-01-01
Supplement: f1 [file 2126876.f1.docx]

Electronic Supplementary Information for

The electric current effect on electrochemical deconsolidation of spherical fuel elements

*Xiaotong Chen*, Zhenming Lu*, Hongsheng Zhao, Bing Liu, Junguo Zhu, Chunhe Tang*

Institute of Nuclear and New Energy Technology, Collaborative Innovation Center of Advanced Nuclear Energy Technology, Tsinghua University, Beijing 100084, PR China

*To whom correspondence should be addressed:

Fax: 86-10-69771464; Tel: +86-10-89796097. E-mail: chenxiaotong@tsinghua.edu.cn.

**Table of content Page**

Figure S1 ---------------------------------------------------------------------------------- S2

Figure S2 ---------------------------------------------------------------------------------- S2

Figure S3 ---------------------------------------------------------------------------------- S3

Figure S4 ---------------------------------------------------------------------------------- S3


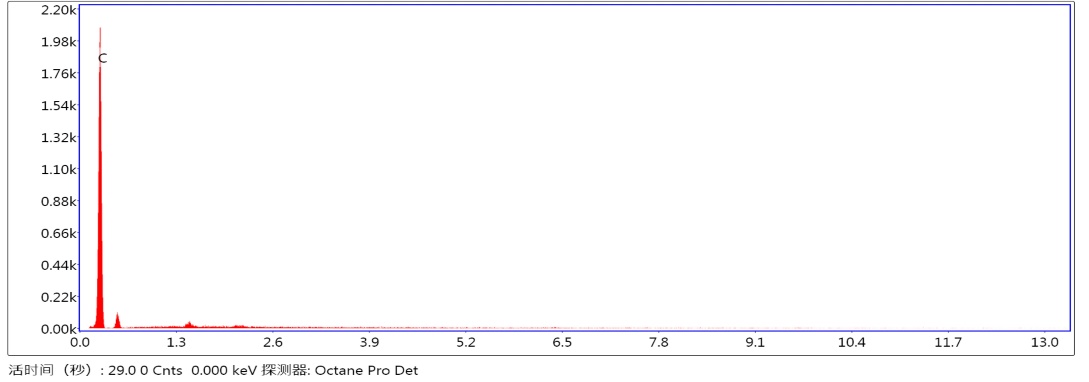


Figure S1. EDS characterization of triso-particle surface after deconsolidation by 2 A


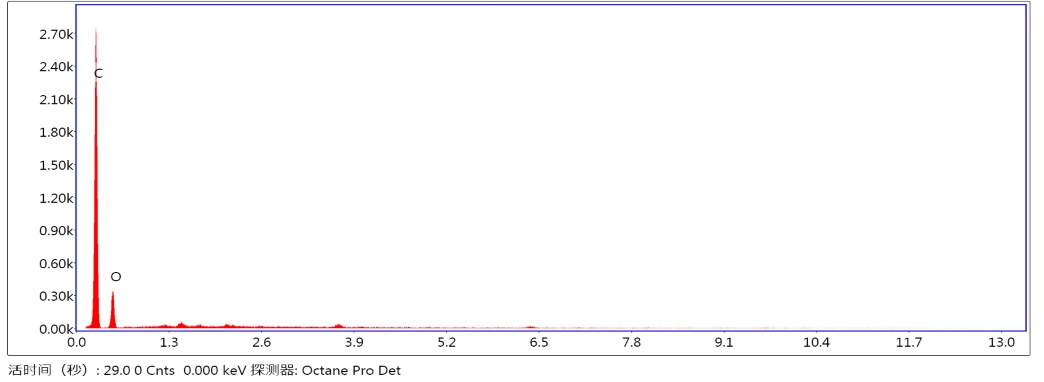


Figure S2. EDS characterization of triso-particle surface after deconsolidation by 7 A


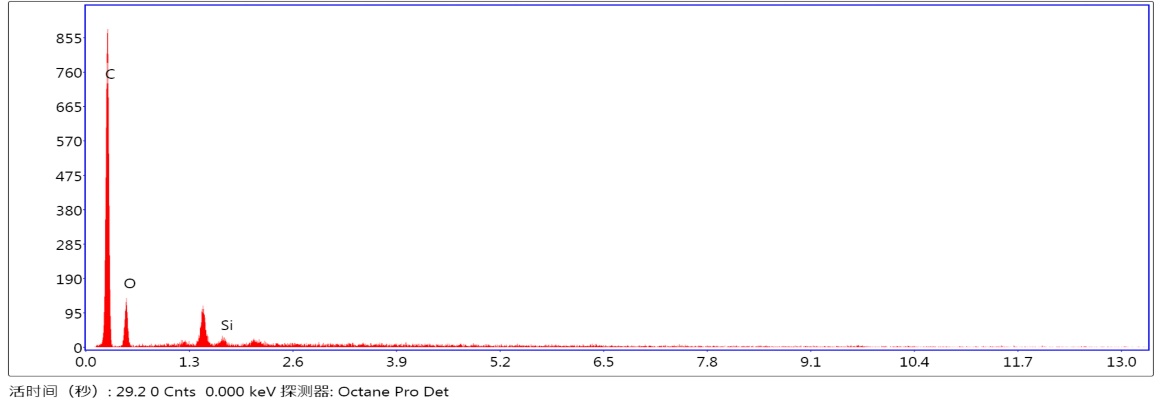


Figure S3. EDS characterization of triso-particle surface after deconsolidation by 10 A


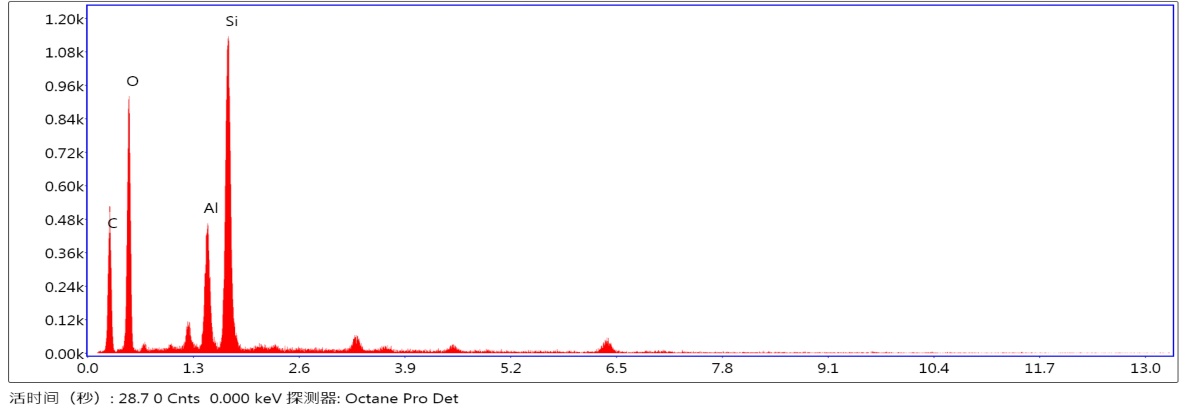


Figure S4. EDS characterization of triso-particle surface after deconsolidation by 13 A
